# Supplementary material for: Lack of tailless leads to an increase in expression variability in Drosophila embryos
Source: PubMed Central journal article supplement (PMC3635121; doi:10.1016/j.ydbio.2013.01.010), 2013-05-01
Supplement: mmc1.pdf [file mmc1.pdf]

# Supplementary Tables

Janssens et al.

**Table S1. Number of embryo expression profiles used for data quantification, per gene and per time class.** (\*) c13 and c14A t1 *tII/tII* embryos can only be distinguished from heterozygous or wild-type embryos through lack of TII expression. Since not all embryos in our data set were stained for TII, the *tII<sup>0</sup>* numbers for c13 and t1 below represent a mix of mutant and wild-type embryos. Comparing embryos without TII staining with wild-type embryos (last 2 columns) shows that there are only very subtle differences in Eve expression in *tII/tII* versus wild-type at this stage (see Figure 4).

| tc   | Eve                    |     | Bcd                    |    | Cad                    |    | Gt                     |    | Hb                     |    | Hkb                    |    | Kni                    |    | Kr                     |    | TII                    |    |
|------|------------------------|-----|------------------------|----|------------------------|----|------------------------|----|------------------------|----|------------------------|----|------------------------|----|------------------------|----|------------------------|----|
|      | <i>tII<sup>0</sup></i> | wt  | <i>tII<sup>0</sup></i> | wt | <i>tII<sup>0</sup></i> | wt | <i>tII<sup>0</sup></i> | wt | <i>tII<sup>0</sup></i> | wt | <i>tII<sup>0</sup></i> | wt | <i>tII<sup>0</sup></i> | wt | <i>tII<sup>0</sup></i> | wt | <i>tII<sup>0</sup></i> | wt |
| c13* | 63                     | 171 | 20                     | 98 | 8                      | 47 | 1                      | 9  | 12                     | 49 | 24                     | 28 | 29                     | 2  | 11                     | 21 | 11                     | 22 |
| t1*  | 192                    | 182 | 36                     | 58 | 27                     | 28 | 36                     | 21 | 51                     | 62 | 83                     | 36 | 64                     | 15 | 44                     | 25 | 18                     | 28 |
| t2   | 69                     | 112 | 15                     | 30 | 13                     | 15 | 24                     | 20 | 23                     | 30 | 15                     | 37 | 19                     | 14 | 12                     | 24 | 13                     | 13 |
| t3   | 57                     | 162 | 15                     | 38 | 7                      | 21 | 14                     | 23 | 19                     | 43 | 11                     | 36 | 14                     | 16 | 11                     | 34 | 14                     | 19 |
| t4   | 62                     | 149 | 14                     | 28 | 7                      | 17 | 17                     | 24 | 22                     | 28 | 17                     | 29 | 17                     | 12 | 16                     | 36 | 13                     | 14 |
| t5   | 76                     | 180 | 24                     | 25 | 13                     | 14 | 21                     | 27 | 32                     | 44 | 15                     | 34 | 24                     | 22 | 17                     | 54 | 16                     | 16 |
| t6   | 51                     | 170 | 19                     | 29 | 3                      | 18 | 16                     | 21 | 29                     | 47 | 11                     | 34 | 21                     | 20 | 20                     | 52 | 15                     | 18 |
| t7   | 49                     | 157 | 20                     | 15 | 6                      | 13 | 20                     | 23 | 15                     | 33 | 10                     | 16 | 16                     | 20 | 12                     | 48 | 7                      | 12 |
| t8   | 31                     | 144 | 7                      | 12 | 3                      | 12 | 8                      | 25 | 10                     | 33 | 3                      | 13 | 13                     | 17 | 13                     | 38 | 6                      | 17 |

**Table S2. Average positions of Eve domain peaks in wild-type and *tl<sup>9</sup>* mutant embryos.** Average positions (in % along the A–P axis, where 0% is the anterior pole) are shown for the point of maximum intensity of each visible Eve stripe from t3 to t8. Moreover, we show Bonferroni-corrected *p*-values resulting from Student’s t-tests for equality of the mean. Shaded boxes highlight *p*-values indicating significant differences in stripe positions in wild-type compared to mutants ( $p < 0.005$ ). See Materials and Methods for details on measurements and statistical tests.

| tc | Stripe1 |                       |         | Stripe2 |                       |         | Stripe3 |                       |         | Stripe4 |                       |        | Stripe5 |                       |       | Stripe6 |                       |       | Stripe7 |                       |       |
|----|---------|-----------------------|---------|---------|-----------------------|---------|---------|-----------------------|---------|---------|-----------------------|--------|---------|-----------------------|-------|---------|-----------------------|-------|---------|-----------------------|-------|
|    | wt      | <i>tl<sup>9</sup></i> | p       | wt      | <i>tl<sup>9</sup></i> | p       | wt      | <i>tl<sup>9</sup></i> | p       | wt      | <i>tl<sup>9</sup></i> | p      | wt      | <i>tl<sup>9</sup></i> | p     | wt      | <i>tl<sup>9</sup></i> | p     | wt      | <i>tl<sup>9</sup></i> | p     |
| 3  | 32.38   | 31.33                 | 203.552 | 42.66   | 42.61                 | 114.943 | 50.84   | 51.62                 | 0.242   | 59.41   | 59.95                 | 6.685  | -       | 69.25                 | -     | -       | 81.91                 | -     | 83.68   | -                     | -     |
| 4  | 31.94   | 31.65                 | 158.843 | 42.40   | 43.06                 | 7.183   | 50.87   | 52.10                 | 0.037   | 58.18   | 59.92                 | 9e-05  | 66.12   | 69.33                 | 6e-12 | 72.94   | 81.75                 | 5e-37 | 84.08   | -                     | -     |
| 5  | 31.65   | 30.66                 | 203.964 | 41.68   | 41.57                 | 139.019 | 50.05   | 50.28                 | 29.702  | 57.34   | 58.15                 | 0.030  | 65.12   | 67.60                 | 2e-14 | 72.45   | 80.12                 | 3e-37 | 82.75   | -                     | -     |
| 6  | 31.56   | 30.62                 | 203.659 | 41.35   | 40.92                 | 193.095 | 49.74   | 49.79                 | 84.960  | 57.11   | 57.82                 | 1.156  | 64.77   | 67.22                 | 3e-06 | 72.28   | 79.81                 | 3e-19 | 81.84   | -                     | -     |
| 7  | 31.69   | 31.37                 | 173.173 | 40.82   | 41.19                 | 21.202  | 49.14   | 49.89                 | 0.549   | 56.47   | 57.60                 | 0.004  | 63.75   | 66.39                 | 4e-11 | 71.11   | 78.87                 | 5e-29 | 80.26   | -                     | -     |
| 8  | 31.89   | 30.54                 | 203.556 | 40.77   | 40.19                 | 185.095 | 48.90   | 48.88                 | 105.582 | 55.99   | 56.35                 | 27.182 | 62.91   | 65.00                 | 5e-05 | 70.32   | 77.60                 | 5e-13 | 79.32   | 87.37                 | 5e-11 |

**Table S3. Temporal shifts of Eve domain peaks in wild-type and *tl<sup>9</sup>* mutant embryos.** This table shows differences between peak positions (in % egg length, EL) at t3 and t8 from Table S2.

|                       | Stripe 1 | Stripe 2 | Stripe 3 | Stripe 4 | Stripe 5 | Stripe 6 | Stripe 7 |
|-----------------------|----------|----------|----------|----------|----------|----------|----------|
| tc                    | 3-8      | 3-8      | 3-8      | 3-8      | 4-8      | 4-8      | 3-8      |
| wt                    | 0.49     | 1.89     | 1.94     | 3.42     | 3.21     | 2.62     | 4.36     |
| <i>tl<sup>9</sup></i> | 0.79     | 2.42     | 2.74     | 3.59     | 4.34     | 4.16     | -        |

**Table S4. Widths of Eve stripes in wild-type compared to *tl<sup>9</sup>* mutant embryos.** Average domain widths (in %EL) are shown for each detectable Eve stripe from t5 to t8. We also show Bonferroni-corrected *p*-values resulting from Student's *t*-tests for equality of the mean domain size. Shaded boxes highlight those *p*-values indicating significant differences in domain width between wild-type and mutant embryos (*p*<0.005).

| tc | Stripe 1 |                       |          | Stripe 2 |                       |          | Stripe 3 |                       |          | Stripe 4 |                       |          | Stripe 5 |                       |          | Stripe 6 |                       |          | Stripe 7 |                       |          |
|----|----------|-----------------------|----------|----------|-----------------------|----------|----------|-----------------------|----------|----------|-----------------------|----------|----------|-----------------------|----------|----------|-----------------------|----------|----------|-----------------------|----------|
|    | wt       | <i>tl<sup>9</sup></i> | <i>p</i> | wt       | <i>tl<sup>9</sup></i> | <i>p</i> | wt       | <i>tl<sup>9</sup></i> | <i>p</i> | wt       | <i>tl<sup>9</sup></i> | <i>p</i> | wt       | <i>tl<sup>9</sup></i> | <i>p</i> | wt       | <i>tl<sup>9</sup></i> | <i>p</i> | wt       | <i>tl<sup>9</sup></i> | <i>p</i> |
| 5  | 5.15     | 4.89                  | 23.820   | 5.55     | 5.38                  | 22.366   | 4.23     | 4.05                  | 23.642   | 3.84     | 3.90                  | 5.995    | 4.70     | 4.55                  | 21.883   | 5.02     | 7.01                  | 5e-15    | 6.94     | -                     | -        |
| 6  | 4.39     | 4.31                  | 18.672   | 5.15     | 4.98                  | 22.164   | 4.11     | 3.92                  | 23.273   | 3.72     | 4.15                  | 0.002    | 4.06     | 4.69                  | 6e-05    | 4.56     | 7.37                  | 5e-15    | 6.45     | -                     | -        |
| 7  | 3.64     | 3.36                  | 23.966   | 4.46     | 3.95                  | 23.998   | 3.74     | 3.59                  | 23.275   | 3.60     | 3.85                  | 0.152    | 3.77     | 4.27                  | 2e-05    | 4.23     | 8.24                  | 5e-15    | 5.63     | -                     | -        |
| 8  | 3.14     | 2.96                  | 22.589   | 3.74     | 3.01                  | 24.000   | 3.32     | 3.11                  | 23.136   | 3.35     | 3.47                  | 3.694    | 3.52     | 3.65                  | 4.265    | 3.86     | 8.68                  | 5e-15    | 5.27     | -                     | -        |

**Table S5. Variability in the positions of Eve stripe peaks in wild-type and *tl<sup>9</sup>* mutant embryos.** Standard deviations (in %EL) are shown for the point of maximum intensity of each detectable Eve stripe from t3 to t8. We also show Bonferroni-corrected *p*-values resulting from Levene's tests for equality of variances. Shaded boxes highlight those *p*-values indicating significant differences in variability between wild-type and mutant embryos (*p*<0.005).

| tc | Stripe 1 |                       |          | Stripe 2 |                       |          | Stripe 3 |                       |          | Stripe 4 |                       |          | Stripe 5 |                       |          | Stripe 6 |                       |          | Stripe 7 |                       |          |
|----|----------|-----------------------|----------|----------|-----------------------|----------|----------|-----------------------|----------|----------|-----------------------|----------|----------|-----------------------|----------|----------|-----------------------|----------|----------|-----------------------|----------|
|    | wt       | <i>tl<sup>9</sup></i> | <i>p</i> | wt       | <i>tl<sup>9</sup></i> | <i>p</i> | wt       | <i>tl<sup>9</sup></i> | <i>p</i> | wt       | <i>tl<sup>9</sup></i> | <i>p</i> | wt       | <i>tl<sup>9</sup></i> | <i>p</i> | wt       | <i>tl<sup>9</sup></i> | <i>p</i> | wt       | <i>tl<sup>9</sup></i> | <i>p</i> |
| 3  | 1.55     | 2.44                  | 0.012    | 1.41     | 1.97                  | 0.085    | 1.27     | 1.57                  | 0.328    | 1.34     | 1.86                  | 0.200    | -        | 2.21                  | -        | -        | 2.97                  | -        | 1.62     | -                     | -        |
| 4  | 1.48     | 2.68                  | 0.019    | 1.33     | 2.59                  | 0.001    | 1.12     | 2.43                  | 2e-05    | 1.08     | 2.39                  | 1e-04    | 1.23     | 2.59                  | 0.011    | 1.27     | 2.61                  | 3e-04    | 1.67     | -                     | -        |
| 5  | 1.50     | 2.02                  | 3.529    | 1.31     | 1.87                  | 9.202    | 1.09     | 1.67                  | 2.753    | 0.99     | 1.70                  | 0.007    | 1.08     | 2.03                  | 2e-06    | 1.23     | 2.83                  | 9e-11    | 1.68     | -                     | -        |
| 6  | 1.45     | 1.99                  | 0.147    | 1.26     | 1.68                  | 3.188    | 1.11     | 1.63                  | 1.588    | 1.11     | 1.80                  | 0.131    | 1.34     | 2.59                  | 1e-03    | 1.49     | 3.51                  | 9e-07    | 1.82     | -                     | -        |
| 7  | 1.45     | 1.92                  | 1.538    | 1.34     | 1.80                  | 2.044    | 1.18     | 1.62                  | 3.737    | 1.16     | 1.58                  | 18.591   | 1.23     | 1.87                  | 0.052    | 1.40     | 2.37                  | 0.085    | 1.57     | -                     | -        |
| 8  | 1.60     | 2.28                  | 17.921   | 1.40     | 2.22                  | 3.361    | 1.17     | 1.88                  | 0.106    | 1.14     | 1.64                  | 2.251    | 1.12     | 1.80                  | 0.159    | 1.26     | 2.96                  | 8e-06    | 1.34     | 2.48                  | 0.242    |

**Table S6. Variability in widths of Eve stripes in wt and *tll<sup>9</sup>* mutant embryos.** Standard deviations (in %EL) are shown for the width of each detectable Eve stripe from t5 to t8. We also show Bonferroni-corrected *p*-values resulting from Levene's tests for equality of variances. Shaded boxes highlight those *p*-values indicating significant differences in width variability between wild-type and mutant embryos (*p*<0.005).

| tc | Stripe 1 |                        |       | Stripe 2 |                        |       | Stripe 3 |                        |       | Stripe 4 |                        |       | Stripe 5 |                        |        | Stripe 6 |                        |       | Stripe 7 |                        |   |
|----|----------|------------------------|-------|----------|------------------------|-------|----------|------------------------|-------|----------|------------------------|-------|----------|------------------------|--------|----------|------------------------|-------|----------|------------------------|---|
|    | wt       | <i>tll<sup>9</sup></i> | p     | wt       | <i>tll<sup>9</sup></i> | p     | wt       | <i>tll<sup>9</sup></i> | p     | wt       | <i>tll<sup>9</sup></i> | p     | wt       | <i>tll<sup>9</sup></i> | p      | wt       | <i>tll<sup>9</sup></i> | p     | wt       | <i>tll<sup>9</sup></i> | p |
| 5  | 0.69     | 0.75                   | 8.671 | 0.60     | 0.81                   | 0.144 | 0.41     | 0.64                   | 0.002 | 0.48     | 0.64                   | 0.344 | 0.78     | 0.72                   | 12.950 | 0.70     | 1.63                   | 9e-09 | 0.64     | -                      | - |
| 6  | 0.50     | 0.73                   | 0.119 | 0.46     | 0.80                   | 1e-05 | 0.39     | 0.67                   | 0.045 | 0.36     | 0.73                   | 6e-07 | 0.46     | 0.86                   | 0.001  | 0.48     | 1.59                   | 3e-13 | 0.73     | -                      | - |
| 7  | 0.47     | 0.54                   | 3.900 | 0.54     | 0.81                   | 0.807 | 0.36     | 0.50                   | 0.572 | 0.34     | 0.66                   | 0.016 | 0.39     | 0.60                   | 0.095  | 0.40     | 1.61                   | 1e-13 | 0.57     | -                      | - |
| 8  | 0.48     | 0.57                   | 1.274 | 0.58     | 0.57                   | 9.730 | 0.38     | 0.58                   | 0.001 | 0.49     | 0.58                   | 0.539 | 0.48     | 0.70                   | 0.135  | 0.48     | 1.56                   | 4e-07 | 0.57     | -                      | - |

**Table S7. Average positions of peaks and boundary positions of gap domains in wild-type and *tll<sup>9</sup>* mutant embryos.** Average positions (in % along the A–P axis, where 0% is the anterior pole) are shown for the position of the anterior boundary, the maximum intensity peak, and the posterior boundary of the central Kr, the posterior Kni, and posterior Gt domain from t3 to t8. See Materials and Methods for details on measurements of boundary and peak positions.

| tc | Central Kr |                        |       |                        |            |                        | Posterior Kni |                        |       |                        |            |                        | Posterior Gt |                        |       |                        |            |                        |
|----|------------|------------------------|-------|------------------------|------------|------------------------|---------------|------------------------|-------|------------------------|------------|------------------------|--------------|------------------------|-------|------------------------|------------|------------------------|
|    | A boundary |                        | Peak  |                        | P boundary |                        | A boundary    |                        | Peak  |                        | P boundary |                        | A boundary   |                        | Peak  |                        | P boundary |                        |
|    | wt         | <i>tll<sup>9</sup></i> | wt    | <i>tll<sup>9</sup></i> | wt         | <i>tll<sup>9</sup></i> | wt            | <i>tll<sup>9</sup></i> | wt    | <i>tll<sup>9</sup></i> | wt         | <i>tll<sup>9</sup></i> | wt           | <i>tll<sup>9</sup></i> | wt    | <i>tll<sup>9</sup></i> | wt         | <i>tll<sup>9</sup></i> |
| 3  | 44.39      | 46.21                  | 52.15 | 53.06                  | 60.16      | 61.11                  | 59.01         | 61.39                  | 64.80 | 66.71                  | 70.68      | 74.04                  | 69.33        | 73.12                  | 75.00 | 83.36                  | 82.26      | 91.70                  |
| 4  | 44.22      | 47.42                  | 52.13 | 55.05                  | 60.11      | 62.78                  | 58.82         | 62.25                  | 64.03 | 67.32                  | 69.82      | 74.83                  | 68.67        | 73.71                  | 74.14 | 80.96                  | 79.77      | 89.65                  |
| 5  | 43.91      | 45.34                  | 51.62 | 52.42                  | 59.56      | 61.16                  | 58.39         | 60.70                  | 63.81 | 66.05                  | 69.38      | 72.33                  | 68.01        | 74.17                  | 73.00 | 80.37                  | 78.48      | 87.38                  |
| 6  | 43.61      | 45.40                  | 51.15 | 51.81                  | 59.19      | 60.80                  | 58.39         | 59.62                  | 63.57 | 65.67                  | 68.99      | 71.66                  | 67.32        | 72.50                  | 72.22 | 78.10                  | 77.51      | 85.12                  |
| 7  | 43.22      | 44.61                  | 50.18 | 50.57                  | 57.87      | 57.86                  | 57.85         | 59.38                  | 63.06 | 65.08                  | 68.34      | 71.03                  | 66.82        | 72.32                  | 71.35 | 78.45                  | 76.36      | 84.61                  |
| 8  | 43.28      | 44.85                  | 49.89 | 49.96                  | 57.16      | 56.05                  | 57.14         | 7.33                   | 62.60 | 63.14                  | 67.65      | 69.03                  | 66.29        | 70.03                  | 70.66 | 77.44                  | 75.48      | 84.4                   |

**Table S8. Temporal shifts of gap domain peaks in wild-type and *tl<sup>g</sup>* mutant embryos.** The values shown in this table represent differences between peak positions (in %EL) at t3 and t8 from Table S7.

| tc  | Central Kr |                       | Posterior Kni |                       | Posterior Gt |                       |
|-----|------------|-----------------------|---------------|-----------------------|--------------|-----------------------|
|     | wt         | <i>tl<sup>g</sup></i> | wt            | <i>tl<sup>g</sup></i> | wt           | <i>tl<sup>g</sup></i> |
| 3-8 | 2.26       | 3.10                  | 2.21          | 3.57                  | 4.34         | 5.92                  |

**Table S9. Widths of gap domains in wild-type and *tl<sup>g</sup>* mutant embryos.** Average domain widths (in %EL) are shown for the central Kr, the posterior Kni, and the posterior Gt domain from t3 to t8.

| tc | Central Kr |                       | Posterior Kni |                       | Posterior Gt |                       |
|----|------------|-----------------------|---------------|-----------------------|--------------|-----------------------|
|    | wt         | <i>tl<sup>g</sup></i> | wt            | <i>tl<sup>g</sup></i> | wt           | <i>tl<sup>g</sup></i> |
| 3  | 15.77      | 14.89                 | 11.67         | 12.65                 | 12.92        | 18.58                 |
| 4  | 15.89      | 15.37                 | 11.00         | 12.58                 | 11.09        | 15.94                 |
| 5  | 15.65      | 15.82                 | 10.98         | 11.63                 | 10.47        | 13.21                 |
| 6  | 15.57      | 15.39                 | 10.61         | 12.04                 | 10.19        | 12.62                 |
| 7  | 14.64      | 13.25                 | 10.50         | 11.65                 | 9.54         | 12.29                 |
| 8  | 13.88      | 11.20                 | 10.52         | 11.70                 | 9.19         | 14.46                 |

**Table S10. Variability in the position of gap domain peaks and boundaries in wild-type and *til<sup>β</sup>* mutant embryos.** Standard deviations (in %EL) are shown for the position of the anterior boundary, the peak of maximum intensity, and the posterior boundary of the central Kr, the posterior Kni, and posterior Gt domain from t3 to t8.

| tc | Central Kr |                        |      |                        |            |                        | Posterior Kni |                        |      |                        |            |                        | Posterior Gt |                        |      |                        |            |                        |
|----|------------|------------------------|------|------------------------|------------|------------------------|---------------|------------------------|------|------------------------|------------|------------------------|--------------|------------------------|------|------------------------|------------|------------------------|
|    | A boundary |                        | Peak |                        | P boundary |                        | A boundary    |                        | Peak |                        | P boundary |                        | A boundary   |                        | Peak |                        | P boundary |                        |
|    | wt         | <i>til<sup>β</sup></i> | wt   | <i>til<sup>β</sup></i> | wt         | <i>til<sup>β</sup></i> | wt            | <i>til<sup>β</sup></i> | wt   | <i>til<sup>β</sup></i> | wt         | <i>til<sup>β</sup></i> | wt           | <i>til<sup>β</sup></i> | wt   | <i>til<sup>β</sup></i> | wt         | <i>til<sup>β</sup></i> |
| 3  | 1.39       | 1.52                   | 1.30 | 1.22                   | 1.25       | 1.35                   | 0.96          | 2.27                   | 0.97 | 2.46                   | 1.02       | 3.67                   | 1.03         | 2.55                   | 0.99 | 5.66                   | 1.79       | 6.15                   |
| 4  | 1.24       | 1.93                   | 1.14 | 2.12                   | 1.20       | 2.42                   | 1.05          | 2.56                   | 0.80 | 2.86                   | 0.88       | 2.72                   | 1.16         | 1.33                   | 1.47 | 1.62                   | 1.81       | 2.96                   |
| 5  | 1.03       | 1.65                   | 1.00 | 2.24                   | 1.05       | 2.22                   | 1.00          | 2.36                   | 0.95 | 3.05                   | 1.18       | 2.61                   | 0.97         | 1.01                   | 1.24 | 1.62                   | 1.48       | 2.07                   |
| 6  | 1.12       | 1.62                   | 0.93 | 1.75                   | 1.19       | 2.30                   | 0.89          | 2.04                   | 0.80 | 2.16                   | 1.06       | 2.69                   | 0.94         | 2.34                   | 1.09 | 1.09                   | 1.33       | 1.47                   |
| 7  | 1.20       | 2.02                   | 1.22 | 1.80                   | 1.43       | 2.46                   | 0.89          | 1.68                   | 1.05 | 1.57                   | 1.04       | 1.66                   | 0.94         | 2.43                   | 1.15 | 2.82                   | 1.07       | 3.50                   |
| 8  | 1.09       | 1.91                   | 0.95 | 2.01                   | 1.42       | 1.20                   | 0.78          | 1.35                   | 0.92 | 1.45                   | 1.01       | 2.03                   | 1.08         | 2.46                   | 1.16 | 1.73                   | 1.22       | 2.98                   |

**Table S11. Variability in widths of gap domains in wild-type and *tl<sup>P</sup>* mutant embryos.** Standard deviations (in %EL) are shown for the width of the central Kr, the posterior Kni, and posterior Gt domain from t3 to t8.

| tc | Central Kr |                       | Posterior Kni |                       | Posterior Gt |                       |
|----|------------|-----------------------|---------------|-----------------------|--------------|-----------------------|
|    | wt         | <i>tl<sup>P</sup></i> | wt            | <i>tl<sup>P</sup></i> | wt           | <i>tl<sup>P</sup></i> |
| 3  | 1.10       | 2.25                  | 1.08          | 2.99                  | 2.07         | 4.66                  |
| 4  | 1.04       | 1.95                  | 0.79          | 1.77                  | 1.02         | 2.82                  |
| 5  | 0.91       | 1.93                  | 0.78          | 2.19                  | 1.16         | 1.93                  |
| 6  | 1.15       | 2.44                  | 0.80          | 2.02                  | 0.83         | 1.97                  |
| 7  | 1.42       | 1.03                  | 0.51          | 0.63                  | 0.48         | 2.01                  |
| 8  | 1.29       | 1.05                  | 0.83          | 1.64                  | 0.54         | 4.28                  |
